# Supplementary material for: Preparation, characterization and DFT+U study of the polar Fe3+-based phase Ba5Fe2ZnIn4S15 containing S = 5/2 zigzag chains
Source: Royal Society of Chemistry journal article supplement (doi:10.1039/d2dt00733a), 2022-01-01
Supplement: d2dt00733a1.pdf [file d2dt00733a1.pdf]

## Preparation, characterization and DFT+*U* study of the polar Fe<sup>3+</sup>- based phase Ba<sub>5</sub>Fe<sub>2</sub>ZnIn<sub>4</sub>S<sub>15</sub> containing S= 5/2 zigzag chains

Batoul Almuoussawi<sup>a</sup>, Victor Duffort<sup>a</sup>, Angel M. Arevalo-Lopez<sup>a</sup>, Maxime Braun<sup>a</sup>, Nora Djelal<sup>a</sup>,  
Houria Kabbour<sup>a\*</sup>

[a] Univ. Lille, CNRS, Centrale Lille, ENSCL, Univ. Artois, UMR 8181 – UCCS – Unité de Catalyse  
et Chimie du Solide, F-59000 Lille, France

**Table S1:** Transformation matrices to apply to the atomic coordinates published in references 5 and 6 for direct comparison with the structure reported in the present article.

| Composition                                       | Reference | Rotation matrix | Translation vector |
|---------------------------------------------------|-----------|-----------------|--------------------|
| Pb <sub>5</sub> ZnGa <sub>6</sub> S <sub>15</sub> | 6         | (a, b, c)       | (½, 0, 0)          |
| Sr <sub>5</sub> ZnGa <sub>6</sub> S <sub>15</sub> | 5         | (a, -b, -c)     | (½, 0, 0)          |

**Table S2.** Atomic positions found after the full relaxation of the **reported** structure of Pb<sub>5</sub>Ga<sub>6</sub>ZnS<sub>15</sub>, the optimized parameters are a= 22.1357 Å. b= 17.9791 Å. c= 6.2361 Å.

| atom | x/a     | y/b     | z/c     | Wyckoff |
|------|---------|---------|---------|---------|
| Pb1  | 0.88795 | 0.63567 | 0.96695 | 8c      |
| Pb2  | 0.89092 | 0.85321 | 0.57628 | 8c      |
| Pb3  | 0.75    | 0.35005 | 0.62541 | 4b      |
| Ga1  | 0.75    | 0.69539 | 0.59209 | 4b      |
| Ga2  | 0.33820 | 0.96656 | 0.95109 | 8c      |
| Ga3  | 0.75    | 0.53212 | 0.92919 | 4b      |
| Ga4  | 0.47182 | 0.6954  | 0.57029 | 8c      |
| Zn1  | 0       | 0       | 0       | 4a      |
| S1   | 0.75    | 0.15820 | 0.45145 | 4b      |
| S2   | 0.84330 | 0.65872 | 0.47120 | 8c      |
| S3   | 0.91798 | 0.99437 | 0.75668 | 8c      |
| S4   | 0.49052 | 0.80902 | 0.72450 | 8c      |
| S5   | 0.99948 | 0.40442 | 0.75505 | 8c      |
| S6   | 0.75    | 0.82051 | 0.56244 | 4b      |
| S7   | 0.87105 | 0.79520 | 0.99046 | 8c      |
| S8   | 0.83281 | 0.47750 | 0.77946 | 8c      |
| S9   | 0.75    | 0.99008 | 0.78207 | 4b      |

**Table S3.** Atomic positions found after the full relaxation of the **modified** structure of  $\text{Pb}_5\text{Ga}_6\text{ZnS}_{15}$ , the optimized parameters are  $a=22.1740 \text{ \AA}$ ,  $b=17.9492 \text{ \AA}$   $c=6.2357 \text{ \AA}$ . The modified sites are highlighted in bold (compared to the reported structure).

| atom       | x/a         | y/b           | z/c           | Wyckoff   |
|------------|-------------|---------------|---------------|-----------|
| Pb1        | 0.88000     | 0.63931       | 0.97872       | 8c        |
| Pb2        | 0.88666     | 0.85083       | 0.57157       | 8c        |
| Pb3        | 0.75        | 0.35766       | 0.62497       | 4b        |
| Ga1        | 0.75        | 0.69607       | 0.59500       | 4b        |
| Ga2        | 0.33762     | 0.96815       | 0.96881       | 8c        |
| <b>Zn1</b> | <b>0.75</b> | <b>0.5321</b> | <b>0.9395</b> | <b>4b</b> |
| Ga4        | 0.47273     | 0.69506       | 0.55657       | 8c        |
| <b>Ga3</b> | <b>0</b>    | <b>0</b>      | <b>0</b>      | <b>4a</b> |
| S1         | 0.75        | 0.16211       | 0.45239       | 4b        |
| S2         | 0.84326     | 0.65863       | 0.47155       | 8c        |
| S3         | 0.91862     | 0.99404       | 0.76467       | 8c        |
| S4         | 0.49157     | 0.80870       | 0.70955       | 8c        |
| S5         | 0.99690     | 0.59539       | 0.74418       | 8c        |
| S6         | 0.75        | 0.82161       | 0.56423       | 4b        |
| S7         | 0.87131     | 0.79775       | 0.99271       | 8c        |
| S8         | 0.83496     | 0.47714       | 0.79364       | 8c        |
| S9         | 0.75        | 0.99109       | 0.79834       | 4b        |

**Table S4.** Atomic positions found after the full relaxation of the **reported** structure of  $\text{Sr}_5\text{Ga}_6\text{ZnS}_{15}$ , the optimized parameters are  $a=22.3343 \text{ \AA}$ ,  $b=18.1860 \text{ \AA}$ ,  $c=6.1778 \text{ \AA}$ .

| atom | x/a     | y/b     | z/c     | Wyckoff |
|------|---------|---------|---------|---------|
| Sr1  | 0.25    | 0.64971 | 0.42804 | 4b      |
| Sr2  | 0.11270 | 0.15063 | 0.46323 | 8c      |
| Sr3  | 0.11158 | 0.36484 | 0.01386 | 8c      |
| Zn1  | 0       | 0       | 0       | 4a      |
| Ga1  | 0.52824 | 0.30656 | 0.43757 | 8c      |
| Ga2  | 0.65872 | 0.03480 | 0.03446 | 8c      |
| Ga3  | 0.25    | 0.46788 | 0.05469 | 4b      |
| Ga4  | 0.25    | 0.30399 | 0.39554 | 4b      |
| S1   | 0.08298 | 0.00316 | 0.23893 | 8c      |
| S2   | 0.00163 | 0.59528 | 0.24524 | 8c      |
| S3   | 0.50524 | 0.19414 | 0.28632 | 8c      |
| S4   | 0.62950 | 0.29880 | 0.48114 | 8c      |
| S5   | 0.15682 | 0.34045 | 0.51225 | 8c      |
| S6   | 0.16667 | 0.51853 | 0.20147 | 8c      |
| S7   | 0.25    | 0.34310 | 0.03209 | 4b      |
| S8   | 0.25    | 0.18051 | 0.43447 | 4b      |
| S9   | 0.25    | 0.00573 | 0.19518 | 4b      |

**Table S5.** Atomic positions found after the full relaxation of the **modified** structure of Sr<sub>5</sub>Ga<sub>6</sub>ZnS<sub>15</sub>. the optimized parameters are a=22.3982 Å. b=18.1004 Å. c=6.1893 Å. The modified sites are highlighted in bold (compared to the reported structure).

| atom       | x/a         | y/b           | z/c           | Wyckoff   |
|------------|-------------|---------------|---------------|-----------|
| Sr1        | 0,25        | 0,65080       | 0,42792       | 4b        |
| Sr2        | 0,11585     | 0,15208       | 0,47010       | 8c        |
| Sr3        | 0,11749     | 0,36519       | 0,01034       | 8c        |
| <b>Ga3</b> | <b>0</b>    | <b>0</b>      | <b>0</b>      | <b>4a</b> |
| Ga1        | 0,52784     | 0,30591       | 0,45373       | 8c        |
| Ga2        | 0,66077     | 0,03299       | 0,01964       | 8c        |
| <b>Zn1</b> | <b>0,25</b> | <b>0,4668</b> | <b>0,0474</b> | <b>4b</b> |
| Ga4        | 0,25        | 0,30383       | 0,39085       | 4b        |
| S1         | 0,08187     | 0,00404       | 0,22934       | 8c        |
| S2         | 0,00200     | 0,40425       | 0,25660       | 8c        |
| S3         | 0,50441     | 0,19299       | 0,30433       | 8c        |
| S4         | 0,62822     | 0,30034       | 0,48461       | 8c        |
| S5         | 0,15709     | 0,34095       | 0,51499       | 8c        |
| S6         | 0,16394     | 0,51725       | 0,18840       | 8c        |
| S7         | 0,25        | 0,33708       | 0,03150       | 4b        |
| S8         | 0,25        | 0,17979       | 0,43984       | 4b        |
| S9         | 0,25        | 0,00734       | 0,18414       | 4b        |

Table S6: Atomic coordinates of the hypothetical aristotype of Ba<sub>5</sub>ZnFe<sub>2</sub>In<sub>4</sub>ZnS<sub>15</sub> in the Amam space group, cell parameters remain unchanged a = 23.458 Å, b = 18.551 Å and c = 6.464 Å.

| Atom | Wyck. | x             | y             | z             |
|------|-------|---------------|---------------|---------------|
| Ba1  | 4c    | $\frac{3}{4}$ | $\frac{1}{3}$ | $\frac{1}{2}$ |
| Ba2  | 8f    | $\frac{5}{8}$ | $\frac{1}{6}$ | $\frac{1}{2}$ |
| Ba3  | 8f    | $\frac{1}{8}$ | $\frac{1}{6}$ | $\frac{1}{2}$ |
| In1  | 4a    | 0             | 0             | 0             |
| In2  | 4c    | $\frac{3}{4}$ | $\frac{2}{3}$ | $\frac{1}{2}$ |
| In3  | 8f    | $\frac{5}{8}$ | $\frac{1}{2}$ | $\frac{1}{2}$ |
| Fe1  | 8f    | $\frac{1}{2}$ | $\frac{2}{3}$ | $\frac{1}{2}$ |
| Zn1  | 4c    | $\frac{3}{4}$ | $\frac{1}{2}$ | 0             |
| S1   | 4c    | $\frac{3}{4}$ | $\frac{5}{6}$ | $\frac{1}{2}$ |
| S2   | 8f    | $\frac{3}{8}$ | $\frac{2}{3}$ | $\frac{1}{2}$ |
| S3   | 16h   | $\frac{1}{2}$ | $\frac{2}{3}$ | $\frac{3}{4}$ |
| S4   | 4c    | $\frac{3}{4}$ | $\frac{2}{3}$ | 0             |
| S5   | 8f    | $\frac{5}{8}$ | $\frac{2}{3}$ | $\frac{1}{2}$ |
| S6   | 16h   | $\frac{5}{8}$ | $\frac{1}{2}$ | $\frac{1}{4}$ |
| S7   | 4c    | $\frac{3}{4}$ | $\frac{1}{2}$ | $\frac{1}{2}$ |

Table S7: Mode decomposition of Ba<sub>5</sub>ZnFe<sub>2</sub>In<sub>4</sub>S<sub>15</sub> using the aristotype as parent structure

| Mode # | Atom | dx      | dy      | dz      | Amplitude (Å) | Irrep.                        |
|--------|------|---------|---------|---------|---------------|-------------------------------|
| 1      | Ba1  | 0       | 0.0381  | 0       | 0.3168        |                               |
| 2      | Ba2  | 0       | 0.027   | 0       | -1.2372       |                               |
| 3      | Ba2  | -0.0213 | 0       | 0       | 0.4893        |                               |
| 4      | Ba3  | 0       | 0.027   | 0       | -0.2359       |                               |
| 5      | Ba3  | -0.0213 | 0       | 0       | 0.7098        |                               |
| 6      | In2  | 0       | 0.0381  | 0       | 0.7557        |                               |
| 7      | In3  | 0       | 0.027   | 0       | 1.1053        |                               |
| 8      | In3  | -0.0213 | 0       | 0       | -1.6496       |                               |
| 9      | Fe1  | 0       | 0.027   | 0       | 1.0958        |                               |
| 10     | Fe1  | -0.0213 | 0       | 0       | 1.3601        |                               |
| 11     | Zn1  | 0       | 0.0381  | 0       | 0.7440        |                               |
| 12     | S1   | 0       | 0.0381  | 0       | -0.2309       | $\Gamma_{1+}$                 |
| 13     | S2   | 0       | 0.027   | 0       | 1.1043        |                               |
| 14     | S2   | -0.0213 | 0       | 0       | -0.0624       | <i>A<sub>am</sub></i>         |
| 15     | S4   | 0       | 0       | 0.0547  | 0.0823        |                               |
|        | S3   | 0       | 0       | -0.0547 |               |                               |
| 16     | S4   | 0       | 0.0191  | 0       | -0.7792       | Global<br>amplitude<br>3.91 Å |
|        | S3   | 0       | 0.0191  | 0       |               |                               |
| 17     | S4   | -0.0151 | 0       | 0       | -0.3434       |                               |
|        | S3   | -0.0151 | 0       | 0       |               |                               |
| 18     | S5   | 0       | 0.0381  | 0       | -0.2414       |                               |
| 19     | S6   | 0       | 0.027   | 0       | -0.2548       |                               |
| 20     | S6   | -0.0213 | 0       | 0       | -1.3685       |                               |
| 21     | S8   | 0       | 0       | 0.0547  | -0.4479       |                               |
|        | S7   | 0       | 0       | -0.0547 |               |                               |
| 22     | S8   | 0       | 0.0191  | 0       | -0.7372       |                               |
|        | S7   | 0       | 0.0191  | 0       |               |                               |
| 23     | S8   | -0.0151 | 0       | 0       | 0.0418        |                               |
|        | S7   | -0.0151 | 0       | 0       |               |                               |
| 24     | S9   | 0       | 0.0381  | 0       | -0.1653       |                               |
| 25     | Ba1  | 0       | 0       | 0.1094  | 0.6308        |                               |
| 26     | Ba2  | 0       | 0       | 0.0774  | -0.1293       |                               |
| 27     | Ba3  | 0       | 0       | 0.0774  | 0.3103        |                               |
| 28     | In1  | 0       | 0       | 0.1094  | 0             |                               |
| 29     | In2  | 0       | 0       | 0.1094  | 0.9599        |                               |
| 30     | In3  | 0       | 0       | 0.0774  | -0.2973       |                               |
| 31     | Fe1  | 0       | 0       | 0.0774  | 0.6723        |                               |
| 32     | Zn1  | 0       | 0       | 0.1094  | -0.4297       |                               |
| 33     | S1   | 0       | 0       | 0.1094  | 0.5851        | $\Gamma_3$                    |
| 34     | S2   | 0       | 0       | 0.0774  | 0.1293        |                               |
| 35     | S4   | 0       | 0       | 0.0547  | -0.1737       |                               |
|        | S3   | 0       | 0       | 0.0547  |               | <i>A<sub>ma2</sub></i>        |
| 36     | S4   | 0       | 0.0191  | 0       | -2.6576       |                               |
|        | S3   | 0       | -0.0191 | 0       |               |                               |
| 37     | S4   | -0.0151 | 0       | 0       | 0.3659        | Global<br>amplitude<br>6.07 Å |
|        | S3   | 0.0151  | 0       | 0       |               |                               |
| 38     | S5   | 0       | 0       | 0.1094  | -0.2468       |                               |
| 39     | S6   | 0       | 0       | 0.0774  | -0.1551       |                               |
| 40     | S8   | 0       | 0       | 0.0547  | 0.7039        |                               |
|        | S7   | 0       | 0       | 0.0547  |               |                               |
| 41     | S8   | 0       | 0.0191  | 0       | 0.3804        |                               |
|        | S7   | 0       | -0.0191 | 0       |               |                               |
| 42     | S8   | -0.0151 | 0       | 0       | 2.8285        |                               |
|        | S7   | 0.0151  | 0       | 0       |               |                               |
| 43     | S9   | 0       | 0       | 0.1094  | -1.7460       |                               |

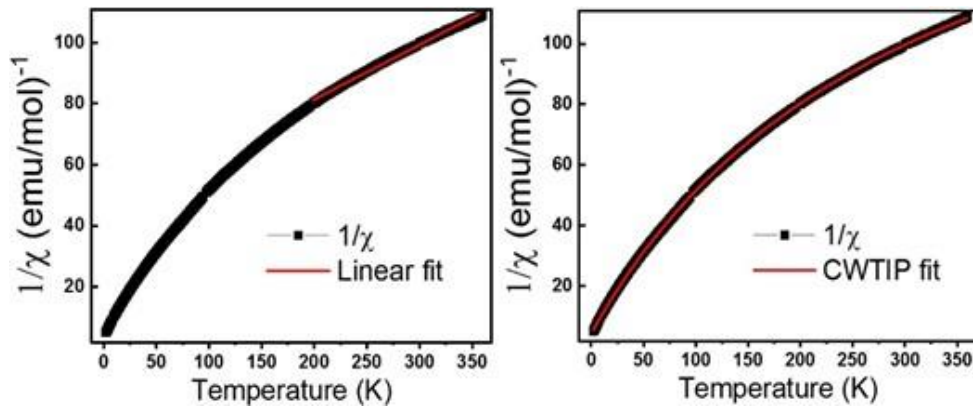

**Figure S1.** On the right: Linear fit of the reciprocal magnetic susceptibility  $1/\chi$  between 200-350K. On the left: CW TIP fit of the reciprocal magnetic susceptibility  $1/\chi$ .

Despite the unidentified impurity, we attempted to fit the magnetic data. We have applied a Curie-Weiss fit from 200-350 K, which led to  $\theta_{\text{CW}} = -358.08$  K and an effective moment of  $\mu_{\text{eff}} = 6.689 \mu_{\text{B}}$  per formula unit, based on  $\text{Ba}_5\text{Fe}_2\text{ZnIn}_4\text{S}_{15}$ . It indicates dominating and strong antiferromagnetic interaction which agrees with the DFT calculated exchange interactions described below. However, regarding the presence of  $\text{Fe}^{3+}$  in a high spin state, the expected theoretical effective moment is of  $5.92 \mu_{\text{B}}$ . Our fitted value is far below considering two  $\text{Fe}^{3+}$  per formula unit. As an alternative and accordingly with the suspicion of a temperature independent paramagnetic (TIP) contribution more visible at high temperature, we applied a Curie-Weiss fit including a TIP contribution. We used the following equation:

$$x = \frac{C}{(T - \theta)} + \alpha$$

where  $C$  is the Curie constant,  $\theta$  is the Curie-Weiss temperature and  $\alpha$  is the TIP contribution. It leads to the following parameters with  $C = 1.540(2) \text{ emu.Oe}^{-1}.\text{g}^{-1}$ ,  $\theta = -7.03(5) \text{ K}$  and  $\alpha = 0.00502(1) \text{ emu.Oe}^{-1}.\text{g}^{-1}$ . The later TIP contribution is rather high. The extracted effective moment is found about  $3.5 \mu_{\text{B}}$  per formula unit, which is even lower than in the standard CW fit. In conclusion, although these preliminary magnetic measurements confirm the dominant antiferromagnetic interactions and point toward a phenomenon around 3 K, it is difficult to extract more information due to the current amount of impurity.

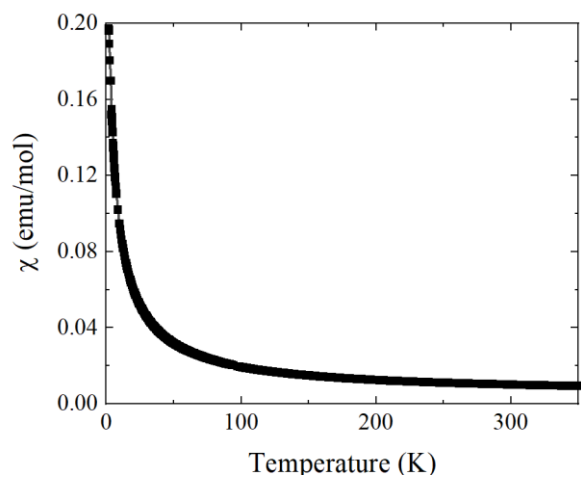

**Figure S2.** Magnetic susceptibility as a function of temperature in the whole measured temperature range.
